# Supplementary material for: KCoO2-type layered nitrides Ca1−xEuxTiN2: structural stability, electrical properties and Eu coordination chemistry
Source: Royal Society of Chemistry journal article supplement (doi:10.1039/d3dt02271d), 2023-01-01
Supplement: d3dt02271d1.pdf [file d3dt02271d1.pdf]

**Supporting Information for**

**KCoO<sub>2</sub>-Type Layered Nitrides Ca<sub>1-x</sub>Eu<sub>x</sub>TiN<sub>2</sub>: Structural Stability,  
Electrical Properties and Eu Coordination Chemistry**

Junwei Liu<sup>1</sup>, Bowen Zhang<sup>1</sup>, Shenglin Lu<sup>1</sup>, Xing Ming<sup>\*,1,2</sup>, Xiaojun Kuang<sup>\*,1,3</sup>

1. *MOE Key Laboratory of New Processing Technology for Nonferrous Metals and Materials, Guangxi Key Laboratory of Optical and Electronic Materials and Devices, College of Materials Science and Engineering, Guilin University of Technology, Guilin 541004, P. R. China*
2. *College of Science, Guilin University of Technology, Guilin 541004, P. R. China*
3. *Guangxi Key Laboratory of Electrochemical and Magnetochemical Functional Materials, College of Chemistry and Bioengineering, Guilin University of Technology, Guilin 541006, P. R. China*

\* E-mail: mingxing@glut.edu.cn (X.M.); kuangxj@glut.edu.cn (X.K.)

**Table S1.** Changes in unit cell parameters of  $\text{Ca}_{1-x}\text{Eu}_x\text{TiN}_2$  solid solution.

| $x$  | $a$ (Å)   | $b$ (Å)   | $c$ (Å)   | $V$ (Å <sup>3</sup> ) | $b/a$ ratio |
|------|-----------|-----------|-----------|-----------------------|-------------|
| 0    | 3.9365    | 3.6131    | 7.5421    | 107.3                 | 0.91785     |
| 0.05 | 3.9344(1) | 3.6280(1) | 7.5501(2) | 107.774(7)            | 0.92212     |
| 0.10 | 3.9314(1) | 3.6423(1) | 7.5544(2) | 108.178(7)            | 0.92646     |
| 0.15 | 3.9274(2) | 3.6558(2) | 7.5574(3) | 108.51(1)             | 0.93084     |
| 0.20 | 3.9245(2) | 3.6666(2) | 7.5600(3) | 108.78(1)             | 0.93428     |
| 0.25 | 3.9134(2) | 3.6946(3) | 7.5647(4) | 109.37(1)             | 0.94409     |
| 0.30 | 3.9097(4) | 3.7061(4) | 7.5679(8) | 109.61(2)             | 0.94792     |
| 0.35 | 3.9047(4) | 3.7164(5) | 7.5701(9) | 109.85(2)             | 0.95178     |
| 0.40 | 3.9050(4) | 3.7162(4) | 7.5685(8) | 109.83(2)             | 0.95165     |

**Table S2.** Theoretically calculated bond lengths and bond angles of the orthorhombic and tetragonal phases  $\text{EuTiN}_2$  within different magnetic structures.

| Orthorhombic |                    |                                     |                    |                    |
|--------------|--------------------|-------------------------------------|--------------------|--------------------|
| FM           | Eu-N1 (Å)          | Eu-N2 (Å)                           | Ti-N1 (Å)          | Ti-N2 (Å)          |
|              | $3.325 \times 2$   | $2.730 \times 4$                    | $2.042 \times 2$   | 1.856              |
|              | $3.122 \times 2$   | 2.502                               | $2.040 \times 2$   |                    |
|              | N1-Eu-N1 (°)       | N2-Eu-N2(°)                         | N1-Eu-N2 (°)       |                    |
|              | $50.110 \times 4$  | $91.413 \times 4$                   | $63.856 \times 4$  | $63.571 \times 4$  |
|              | 74.709             | $92.051 \times 2$                   | $143.784 \times 2$ | $113.909 \times 4$ |
|              | 72.431             | $87.880 \times 2 / 180 \times 2$    | $142.645 \times 2$ | $113.667 \times 4$ |
|              | N1-Ti-N2 (°)       | Eu-N1-Ti (°)                        | Eu-N2-Ti (°)       | N1-Ti-N1(°)        |
|              | $105.849 \times 2$ | $69.633 \times 2$                   | 180                | $84.172 \times 4$  |
|              | $111.828 \times 2$ | $74.473 \times 2$                   |                    | 136.344 / 148.302  |
| AFM          | Eu-N1 (Å)          | Eu-N2 (Å)                           | Ti-N1 (Å)          | Ti-N2 (Å)          |
|              | $3.171 \times 2$   | $2.732 \times 4$                    | $2.041 \times 2$   | 1.855              |
|              | $3.264 \times 2$   | 2.502                               | $2.040 \times 2$   |                    |
|              | N1-Eu-N1 (°)       | N2-Eu-N2(°)                         | N1-Eu-N2 (°)       |                    |
|              | $50.236 \times 4$  | $91.273 \times 4$                   | $63.822 \times 4$  | $63.702 \times 4$  |
|              | 73.249             | $177.454 \times 2$                  | $113.937 \times 4$ | $114.040 \times 4$ |
|              | 74.315             | $90.919 \times 2 / 89.024 \times 2$ | $143.375 \times 2$ | $142.842 \times 2$ |
|              | N1-Ti-N2 (°)       | Eu-N1-Ti (°)                        | Eu-N2-Ti (°)       | N1-Ti-N1(°)        |

|    |                    |                                      |                    |                    |
|----|--------------------|--------------------------------------|--------------------|--------------------|
|    | $110.172 \times 2$ | $73.014 \times 2$                    | 180                | $84.073 \times 4$  |
|    | $107.426 \times 2$ | $70.801 \times 2$                    |                    | 145.148 / 139.657  |
| PM | Eu-N1 (Å)          | Eu-N2 (Å)                            | Ti-N1 (Å)          | Ti-N2 (Å)          |
|    | $2.553 \times 2$   | $2.583 \times 4$                     | $2.061 \times 2$   | 2.002              |
|    | $3.779 \times 2$   | 2.277                                | $2.006 \times 2$   |                    |
|    | N1-Eu-N1 (°)       | N2-Eu-N2 (°)                         | N1-Eu-N2 (°)       |                    |
|    | $49.188 \times 4$  | $88.534 \times 4$                    | $115.720 \times 4$ | $67.009 \times 4$  |
|    | 64.116             | $177.067 \times 2$                   | $67.612 \times 4$  | $114.857 \times 4$ |
|    | 79.081             | $101.928 \times 2 / 77.995 \times 2$ | $140.460 \times 2$ | $147.942 \times 2$ |
|    | N1-Ti-N2 (°)       | Eu-N1-Ti (°)                         | Eu-N2-Ti (°)       | N1-Ti-N1 (°)       |
|    | $127.947 \times 2$ | $88.407 \times 2$                    | 180                | $89.422 \times 4$  |
|    | $90.940 \times 2$  | $58.882 \times 2$                    |                    | 178.120 / 104.106  |

#### Tetragonal

|    |                   |                                   |                    |                    |
|----|-------------------|-----------------------------------|--------------------|--------------------|
| FM | Eu-N1 (Å)         | Eu-N2 (Å)                         | Ti-N1 (Å)          | Ti-N2 (Å)          |
|    | $3.220 \times 4$  | $2.731 \times 4 / 2.500 \times 1$ | $2.039 \times 4$   | 1.855              |
|    | N1-Eu-N1 (°)      | N2-Eu-N2 (°)                      | N1-Ti-N1 (°)       | N1-Eu-N2 (°)       |
|    | $50.163 \times 4$ | $89.968 \times 4$                 | $84.038 \times 4$  | $113.875 \times 8$ |
|    | $73.667 \times 2$ | $91.364 \times 4$                 | $142.398 \times 2$ | $63.715 \times 8$  |
|    |                   | $177.272 \times 2$                |                    | $143.166 \times 4$ |

|     |              |                   |              |              |
|-----|--------------|-------------------|--------------|--------------|
|     | N1-Ti-N2 (°) | Eu-N1-Ti (°)      | Eu-N2-Ti (°) |              |
|     | 108.801 × 2  | 71.967 × 4        | 180          |              |
| AFM | Eu-N1 (Å)    | Eu-N2 (Å)         | Ti-N1 (Å)    | Ti-N2 (Å)    |
|     | 3.217 × 4    | 2.732 × 4 / 2.501 | 2.041 × 4    | 1.855        |
|     | N1-Eu-N1 (°) | N2-Eu-N2 (°)      | N1-Ti-N1 (°) | N1-Eu-N2 (°) |
|     | 50.243 × 4   | 91.271 × 4        | 84.045 × 4   | 63.757 × 8   |
|     | 73.796 × 2   | 89.972 × 4        | 142.421 × 2  | 113.998 × 8  |
|     |              | 177.458 × 2       |              | 143.102 × 4  |
|     | N1-Ti-N2 (°) | Eu-N1-Ti (°)      | Eu-N2-Ti (°) |              |
|     | 108.790 × 4  | 71.892 × 4        | 180          |              |
| PM  | Eu-N1 (Å)    | Eu-N2 (Å)         | Ti-N1 (Å)    | Ti-N2 (Å)    |
|     | 3.172 × 4    | 2.663 × 4 / 2.278 | 1.999 × 4    | 1.915        |
|     | N1-Eu-N1 (°) | N2-Eu-N2 (°)      | N1-Ti-N1 (°) | N1-Eu-N2 (°) |
|     | 49.647 × 4   | 89.298 × 4        | 83.556 × 4   | 65.800 × 8   |
|     | 72.842 × 2   | 89.991 × 4        | 140.853 × 2  | 115.445 × 8  |
|     |              | 178.596 × 2       |              | 143.579 × 4  |
|     | N1-Ti-N2 (°) | Eu-N1-Ti (°)      | Eu-N2-Ti (°) |              |
|     | 109.573 × 2  | 73.152 × 4        | 180          |              |

**Table S3.** The theoretically calculated lattice parameters, energies and spin moment of the Eu ions ( $M_{\text{Eu}}$ ) of the experimental reported stable  $\text{Eu}^{2+}$ -containing compounds  $\text{EuTiO}_3$  and  $\text{EuMg}_2\text{Sb}_2$  within different magnetism (PM, FM, A-AFM, C-AFM, and G-AFM denote paramagnetic, ferromagnetic, A-, C- and G-types antiferromagnetic ordering).

| Material                   |           |         |         |         |                       |                  |                                      |
|----------------------------|-----------|---------|---------|---------|-----------------------|------------------|--------------------------------------|
| Phase                      | Magnetism | $a$ (Å) | $b$ (Å) | $c$ (Å) | $V$ (Å <sup>3</sup> ) | Energy (eV/f.u.) | $M_{\text{Eu}}$ ( $\mu_{\text{B}}$ ) |
| (space group)              |           |         |         |         |                       |                  |                                      |
|                            | PM        | 3.8895  | /       | /       | 58.843                | -29.3538         | 0                                    |
| $\text{EuTiO}_3$           | FM        | 3.9051  | /       | /       | 59.55                 | -40.0774         | 6.959                                |
| Cubic                      | A-AFM     | 3.9051  | /       | /       | 59.55                 | -40.0765         | 6.958                                |
| ( $Pm\bar{3}m$ )           | C-AFM     | 3.9051  | /       | /       | 59.55                 | -40.0758         | 6.957                                |
|                            | G-AFM     | 3.9051  | /       | /       | 59.55                 | -40.0755         | 6.954                                |
|                            | PM        | 5.4347  | 5.4347  | 7.8883  | 232.99                | -31.5751         | 0                                    |
| $\text{EuTiO}_3$           | FM        | 5.4875  | 5.4875  | 7.8714  | 237.03                | -40.1077         | 6.957                                |
| Tetragonal                 | A-AFM     | 5.4864  | 5.4864  | 7.8666  | 236.79                | -40.1073         | 6.956                                |
| ( $I4/mcm$ )               | C-AFM     | 5.4883  | 5.4883  | 7.8602  | 236.76                | -40.1059         | 6.955                                |
|                            | G-AFM     | 5.4866  | 5.4866  | 7.8622  | 236.67                | -40.1064         | 6.952                                |
|                            | PM        | 4.6646  | 4.6646  | 7.3511  | 138.52                | -7.3669          | 0                                    |
| $\text{EuMg}_2\text{Sb}_2$ | FM        | 4.7009  | 4.7009  | 7.6692  | 146.77                | -16.5923         | 6.981                                |
| Trigonal                   |           |         |         |         | 146.54                |                  |                                      |
| ( $P\bar{3}m1$ )           | A-AFM     | 4.6950  | 4.6950  | 7.6759  |                       | -16.5937         | 6.986                                |

**Table S4.** The evolution of lattice parameters, separation distances (denoted by  $d$ ) between the N planes and formation energies (eV/f.u.) of  $\text{Ca}_{1-x}\text{A}_x\text{TiN}_2$  ( $\text{A} = \text{Sr}, \text{Eu}$ ) along with ionic substitution content.

|                                                 | $a$ (Å) | $b$ (Å) | $c$ (Å) | $V$ (Å <sup>3</sup> ) | $b/a$ ratio | $d$ (Å) | Formation energy |
|-------------------------------------------------|---------|---------|---------|-----------------------|-------------|---------|------------------|
| $\text{CaTiN}_2$                                | 3.9512  | 3.5659  | 7.5260  | 106.04                | 0.90249     | 0.546   | -3.514           |
| $\text{Ca}_{15/16}\text{Sr}_{1/16}\text{TiN}_2$ | 3.9469  | 3.5872  | 7.5388  | 106.74                | 0.90887     | 0.510   | -3.529           |
| $\text{Ca}_{14/16}\text{Sr}_{2/16}\text{TiN}_2$ | 3.9424  | 3.6085  | 7.5504  | 107.41                | 0.91531     | 0.473   | -3.544           |
| $\text{Ca}_{13/16}\text{Sr}_{3/16}\text{TiN}_2$ | 3.9416  | 3.6274  | 7.5585  | 108.07                | 0.92029     | 0.445   | -3.556           |
| $\text{Ca}_{12/16}\text{Sr}_{4/16}\text{TiN}_2$ | 3.9415  | 3.6454  | 7.5662  | 108.71                | 0.92488     | 0.419   | -3.569           |
| $\text{Ca}_{8/16}\text{Sr}_{8/16}\text{TiN}_2$  | 3.9012  | 3.7566  | 7.5967  | 111.33                | 0.96293     | 0.204   | -3.644           |
| $\text{SrTiN}_2$                                | 3.8936  | 3.8483  | 7.6907  | 115.23                | 0.98837     | 0.057   | -3.855           |
| $\text{CaTiN}_2$                                | 3.9512  | 3.5659  | 7.5260  | 106.04                | 0.90249     | 0.546   | -3.514           |
| $\text{Ca}_{15/16}\text{Eu}_{1/16}\text{TiN}_2$ | 3.9480  | 3.5821  | 7.5325  | 106.53                | 0.90732     | 0.520   | -3.348           |
| $\text{Ca}_{14/16}\text{Eu}_{2/16}\text{TiN}_2$ | 3.9496  | 3.5940  | 7.5412  | 107.04                | 0.90997     | 0.506   | -3.177           |
| $\text{Ca}_{13/16}\text{Eu}_{3/16}\text{TiN}_2$ | 3.9520  | 3.6036  | 7.5425  | 107.42                | 0.91184     | 0.495   | -3.004           |
| $\text{Ca}_{12/16}\text{Eu}_{4/16}\text{TiN}_2$ | 3.9515  | 3.6195  | 7.5482  | 107.96                | 0.91598     | 0.471   | -2.832           |
| $\text{Ca}_{8/16}\text{Eu}_{8/16}\text{TiN}_2$  | 3.9526  | 3.6657  | 7.5647  | 109.61                | 0.92741     | 0.410   | -2.159           |
| $\text{EuTiN}_2$                                | 3.9287  | 3.7882  | 7.5988  | 113.09                | 0.96424     | 0.201   | -0.848           |

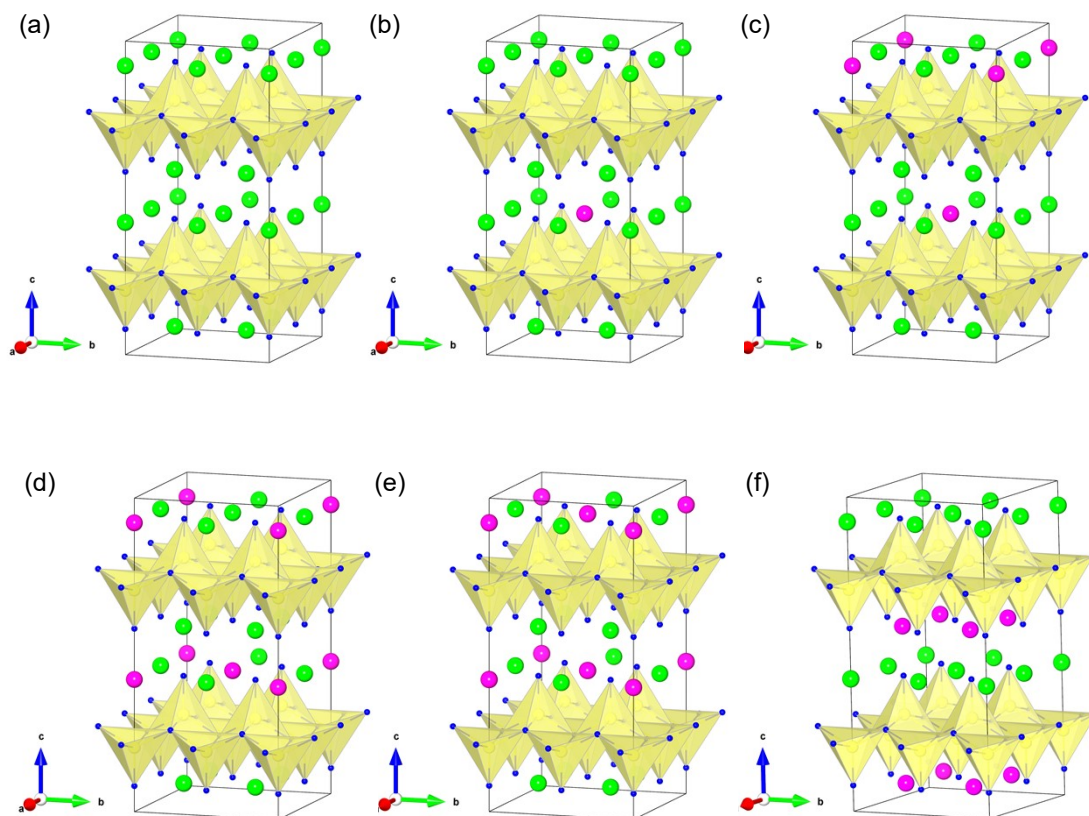

**Figure S1.** The crystal structure models of the  $\text{Ca}_{1-x}\text{A}_x\text{TiN}_2$  ( $\text{A} = \text{Sr}$  or  $\text{Eu}$ ) solid solution with compositions of (a)  $x = 0$ , (b)  $x = 0.0625$  ( $1/16$ ), (c)  $x = 0.125$  ( $2/16$ ), (d)  $x = 0.1875$  ( $3/16$ ), (e)  $x = 0.25$  ( $4/16$ ), and (f)  $x = 0.5$  ( $8/16$ ) within the  $2 \times 2 \times 2$  supercells. The big green, big pink and small blue spheres denote the Ca, A and N atoms, while the Ti atoms (yellow spheres) are in the center of the light yellow octahedra.



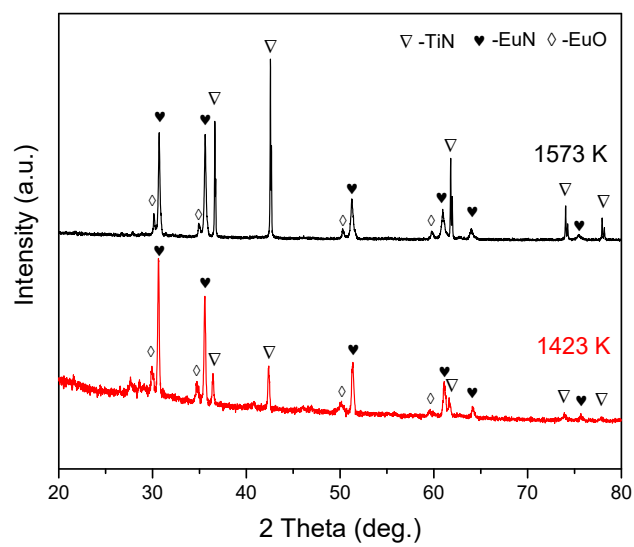

**Figure S2.** XRD data of nominal  $\text{EuTiN}_2$  synthesized at 1573 K and 1423 K.

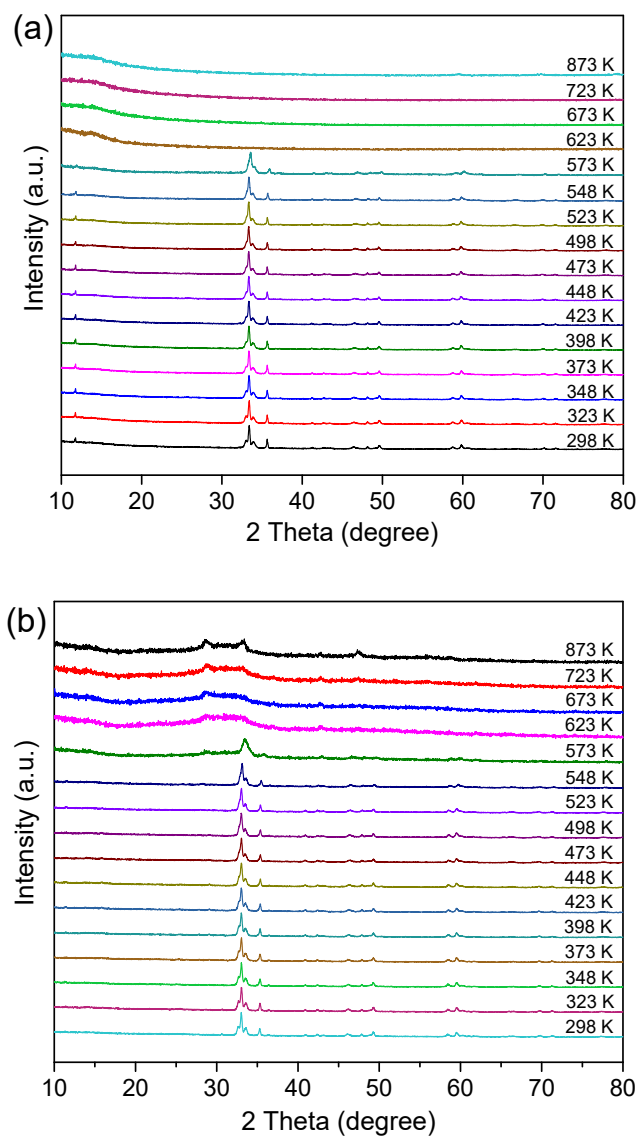

**Figure S3.** Selected VT-XRD data for  $\text{Ca}_{1-x}\text{Eu}_x\text{TiN}_2$  solid solutions with (a)  $x = 0.25$  and (b)  $x = 0.35$ .

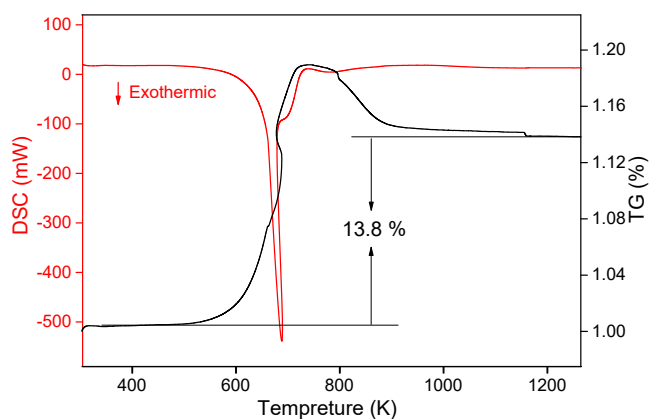

**Figure S4.** TGA-DSC curve of  $\text{Ca}_{0.75}\text{Eu}_{0.25}\text{TiN}_2$  in air atmosphere. The mass gain took place from 500 K and reached a maximum within 700-750 K, followed by a decrease before entering an essentially constant mass region above 900 K. Such TG behavior is common for nitride samples. Since the test was carried out in an air atmosphere, the reaction between the sample and oxygen and other components in air during the heating process could generate some intermediates, which could decompose at high temperature and eventually become stable oxides. Alternatively, as the powder sample was used in the TGA measurement, its surface adsorption may also cause the mass of the sample to increase first and then decrease.<sup>[1, 2]</sup>

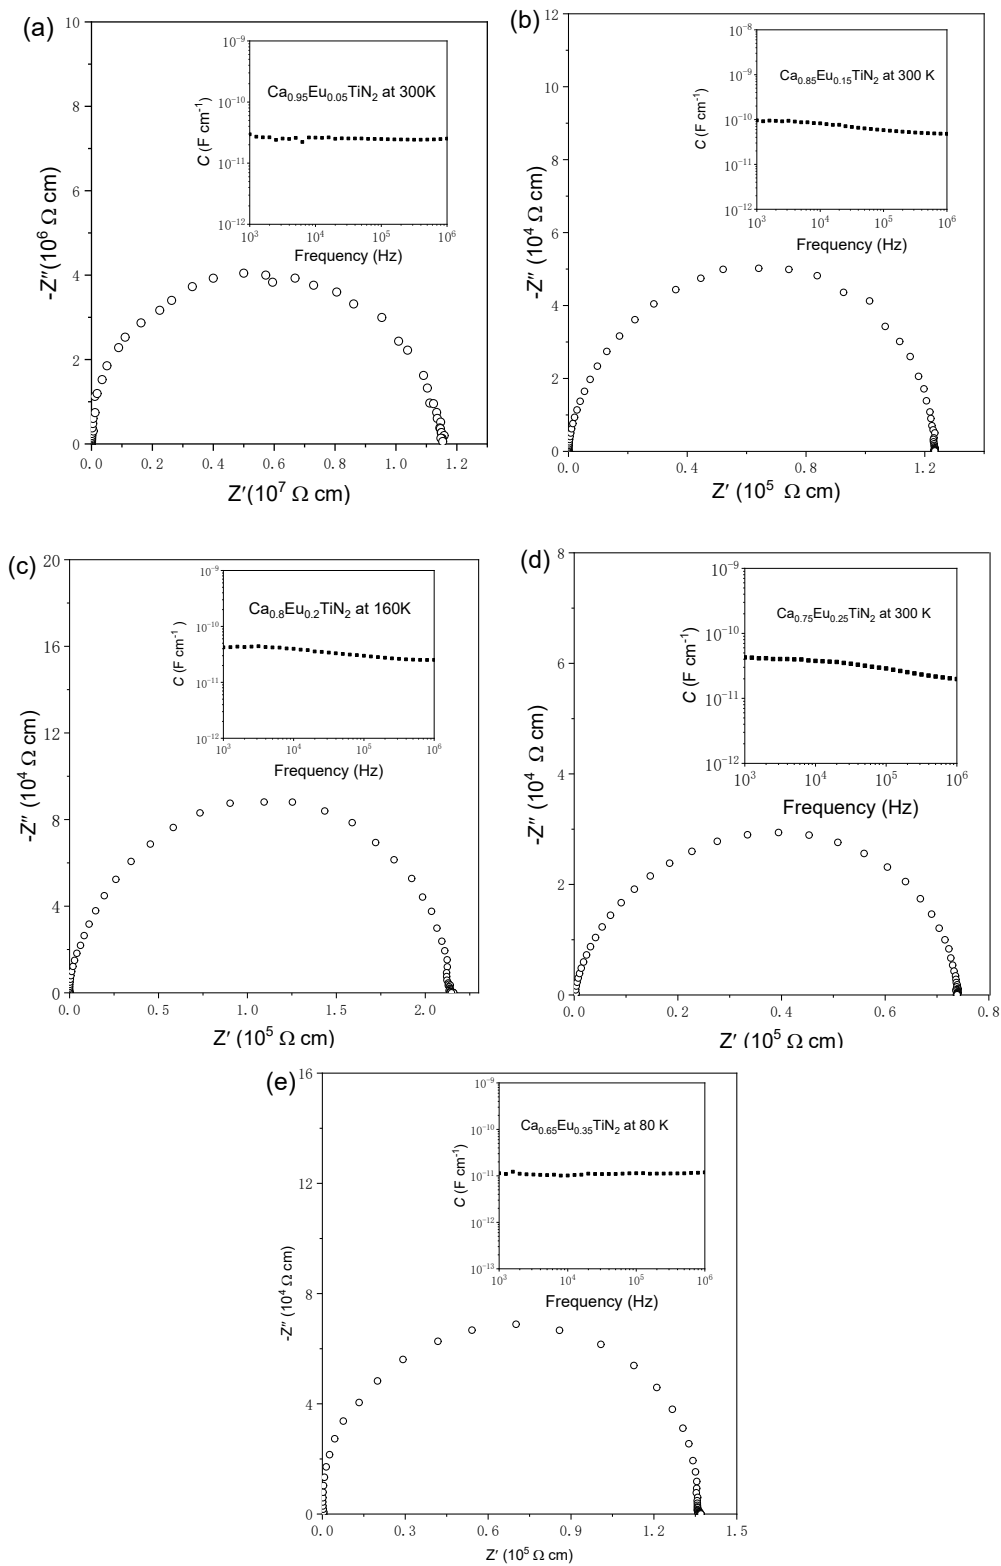

**Figure S5.** Complex impedance plots of  $\text{Ca}_{1-x}\text{Eu}_x\text{TiN}_2$ : (a)  $x = 0.05$ , (b)  $x = 0.15$ , (c)  $x = 0.2$ , (d)  $x = 0.25$  and (e)  $x = 0.35$ .

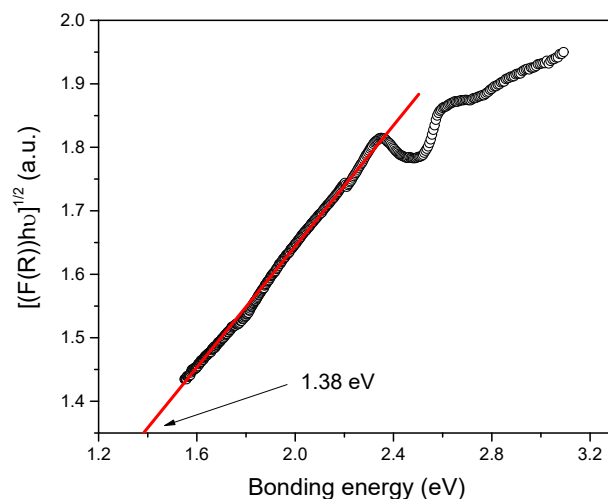

**Figure S6.**  $(\alpha h\nu)^{1/2}$  versus photon energy  $h\nu$  plots from the UV-Vis light absorption spectra of  $\text{Ca}_{0.8}\text{Eu}_{0.2}\text{TiN}_2$ .

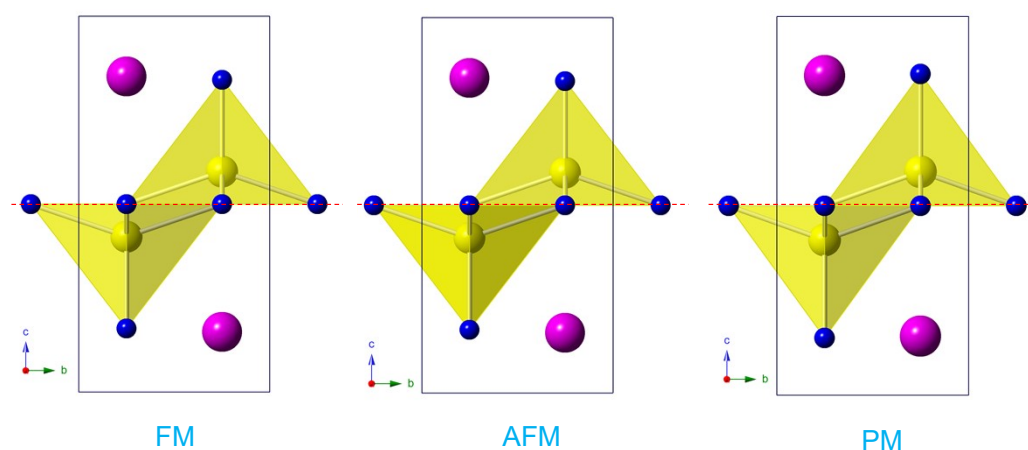

**Figure S7.** Optimized tetragonal structures of the hypothetical  $\text{EuTiN}_2$  in ferromagnetic (FM), antiferromagnetic (AFM) magnetic ordering states and paramagnetic (PM) state. Due to the little difference of the lattice constants, bond lengths and bond angles as tabulated in **Table 1** and **Table S2**, it is hard to visualize the tiny difference between these three structures.

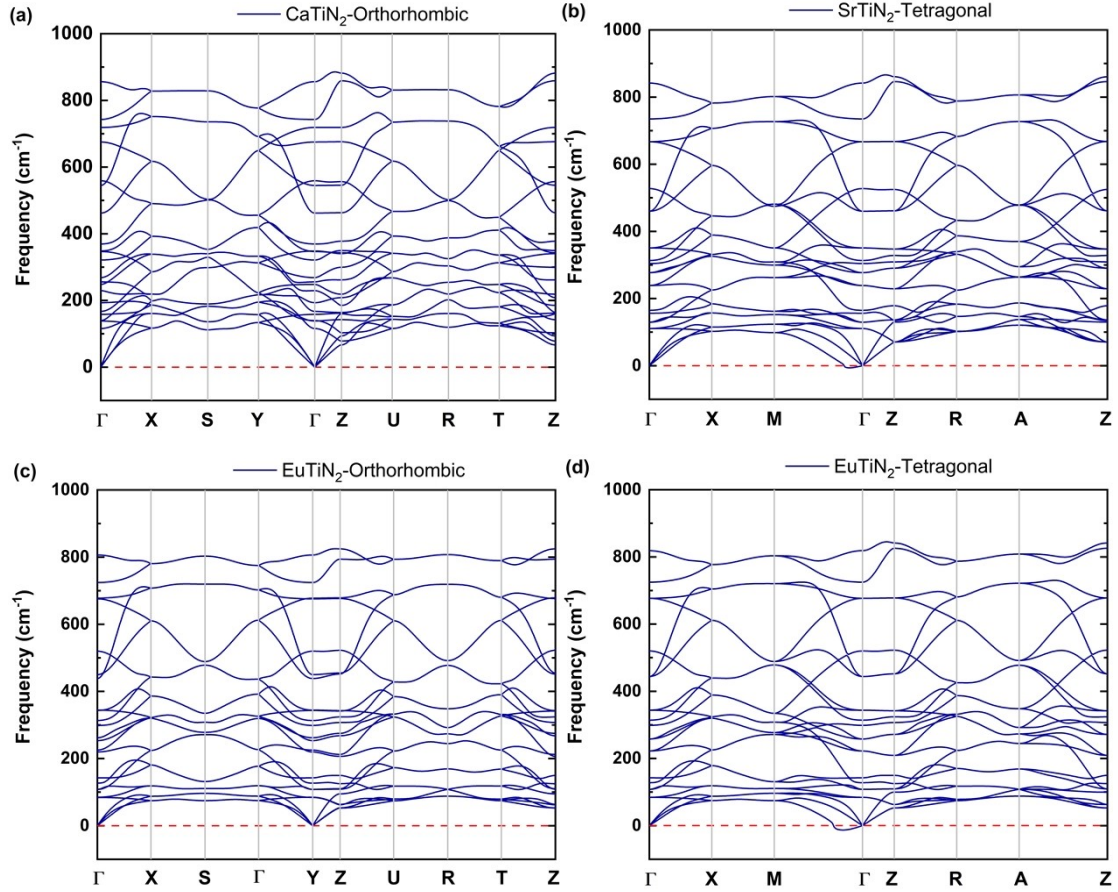

**Figure S8.** The phonon spectra of the end member of  $\text{Ca}_{1-x}\text{A}_x\text{TiN}_2$ , *i.e.*  $\text{ATiN}_2$  ( $\text{A} = \text{Ca}, \text{Sr}, \text{Eu}$ ) for the stable orthorhombic and tetragonal phases within a  $3 \times 3 \times 2$  supercell: (a) orthorhombic  $\text{CaTiN}_2$ , (b) tetragonal  $\text{SrTiN}_2$ , (c) orthorhombic and (d) tetragonal phases  $\text{EuTiN}_2$ . The  $\text{CaTiN}_2$  and  $\text{SrTiN}_2$  were nonmagnetic, whereas the orthorhombic and tetragonal phases  $\text{EuTiN}_2$  were calculated for the ferromagnetic (FM) ordering structure. The phonon spectra were calculated using the finite differences method as implemented in VASP. Post-processing and analysis have been performed using the software Phonopy<sup>[3]</sup>.

## Magnetic ordering transition temperature calculations

The magnetic ordering transition temperature  $T_c$  (here is the FM Curie temperature) of  $\text{EuTiN}_2$  can be estimated according to mean field theory<sup>[4,5]</sup>, which is

defined as:  $T_c = \frac{2S(S+1)}{3k_B}(2J_1 + 2J_2)$ , where  $k_B$  is the Boltzmann constant,  $J_1$  and  $J_2$  are

the exchange interaction constants between the nearest neighbor and next nearest neighbor  $\text{Eu}^{2+}$  ions,  $S$  is the spin moment of the  $\text{Eu}^{2+}$  ion. The exchange constant  $J_{ij}$  describes the interactions between spins  $S_i$  and  $S_j$  by the classical Heisenberg model:

$$H = - \sum_{i \neq j} J_{ij} S_i \cdot S_j$$

. Due to the structural symmetry, the paths of the  $J_1$  and  $J_2$  exchange interactions are different in the orthorhombic phase, which are the same in the tetragonal phase. Therefore, the exchange constant  $J_1$  ( $J_2$ ) describes the interactions between 2 nearest-neighbor (2 next nearest-neighbor)  $\text{Eu}^{2+}$  ions for the orthorhombic phase due to different Eu-Eu interatomic distances, while there is only one exchange constant  $J_1$  describes the interaction between 4 nearest-neighbor  $\text{Eu}^{2+}$  ions for the tetragonal phase due to equal Eu-Eu interatomic distances. In order to derive the exchange constants, FM and AFM1 configurations are considered for the tetragonal phase, while FM, AFM2 and AFM3 configurations are considered for the orthorhombic phase, for which the schematic figures are shown in **Figure S9**. By

constructing a  $2 \times 2$  supercell with two layers of  $\text{Eu}^{2+}$  ions aligning as depicted in **Figure S9**, the total energies per supercell of these magnetic configurations are given

by the equations:  $E_{FM} = E_0 - 8J_1S^2 - 8J_2S^2$ ,  $E_{AFM1} = E_0 + 8J_1S^2 + 8J_2S^2$ ,

$E_{AFM2} = E_0 + 8J_1S^2 - 8J_2S^2$ , and  $E_{AFM3} = E_0 - 8J_1S^2 + 8J_2S^2$ , where  $S$  is the spin moment of

the  $\text{Eu}^{2+}$  ions ( $S = 7/2$ ) and  $E_0$  is the system energy independent of the magnetic

ordering. Then we can deduce the exchange constant  $J_1 = \frac{1}{32S^2}(E_{AFM1} - E_{FM})$  for the tetragonal phase, and  $J_1 = \frac{1}{16S^2}(E_{AFM2} - E_{FM})$  and  $J_2 = \frac{1}{16S^2}(E_{AFM3} - E_{FM})$  for the orthorhombic phase. The exchange constants are obtained as  $J_1 = 0.248$  meV and  $J_2 = 0.298$  meV for the orthorhombic phase,  $J_1 = 0.203$  meV for the tetragonal phase. The Curie temperatures  $T_c$  are estimated to be 133 and 99 K for the orthorhombic and tetragonal phases, respectively.

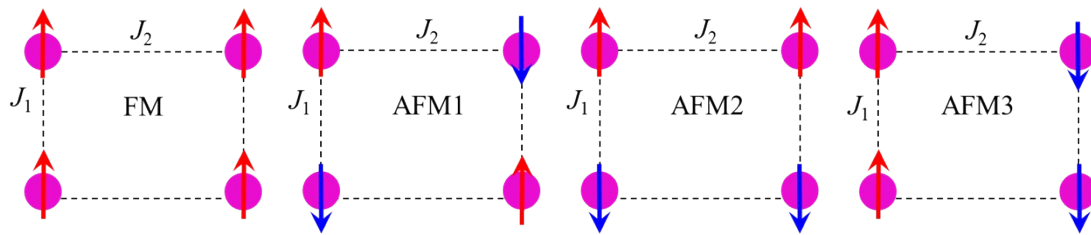

**Figure S9.** Theoretically hypothetical spin parallel (FM) and spin antiparallel (AFM1, AFM2 and AFM3) configurations of one-layer  $\text{Eu}^{2+}$  ions in the orthorhombic or tetragonal phase  $\text{EuTiN}_2$ . The up/down arrows denote the spin direction of the  $\text{Eu}^{2+}$  ions. Note that the  $J_1$  and  $J_2$  exchange interactions are the same in the tetragonal phase.

## References

- (1) D. Logvinovich, L. Bocher, D. Sheptyakov, et al., *Solid State Sci.* **2009**, 11, 1513-1519.
- (2) F. Oehler, H.T. Langhammer, S.G. Ebbinghaus *J. Eur. Ceram. Soc.* **2017**, 37, 2129-2136.
- (3) A. Togo, I. Tanaka, *Scripta Mater.* **2015**, 108, 1-5.
- (4) P. Kurz, G. Bihlmayer, S. Blugel, *J. Phys-Condens. Mat.*, 2002, 14, 6353-6371.
- (5) Y. Fujioka, J. Frantti, R.M. Nieminen, *J. Phys. Chem. B*, 2008, 112, 6742-6746.
